# Supplementary material for: The Warwick-Edinburgh Mental Well-being Scale (WEMWBS): development and UK validation
Source: Springer Nature journal article supplement (doi:10.1186/1477-7525-5-63), 2007-11-27
Supplement: 12955_2007_394_MOESM1_ESM.pdf [file 12955_2007_394_MOESM1_ESM.pdf]

# The Warwick-Edinburgh Mental Well-being Scale (WEMWBS)

**Below are some statements about feelings and thoughts.**

**Please tick the box that best describes your experience of  
each over the last 2 weeks**

| STATEMENTS                                         | None<br>of the<br>time | Rarely | Some<br>of the<br>time | Often | All of<br>the<br>time |
|----------------------------------------------------|------------------------|--------|------------------------|-------|-----------------------|
| I've been feeling optimistic about the future      | 1                      | 2      | 3                      | 4     | 5                     |
| I've been feeling useful                           | 1                      | 2      | 3                      | 4     | 5                     |
| I've been feeling relaxed                          | 1                      | 2      | 3                      | 4     | 5                     |
| I've been feeling interested in other people       | 1                      | 2      | 3                      | 4     | 5                     |
| I've had energy to spare                           | 1                      | 2      | 3                      | 4     | 5                     |
| I've been dealing with problems well               | 1                      | 2      | 3                      | 4     | 5                     |
| I've been thinking clearly                         | 1                      | 2      | 3                      | 4     | 5                     |
| I've been feeling good about myself                | 1                      | 2      | 3                      | 4     | 5                     |
| I've been feeling close to other people            | 1                      | 2      | 3                      | 4     | 5                     |
| I've been feeling confident                        | 1                      | 2      | 3                      | 4     | 5                     |
| I've been able to make up my own mind about things | 1                      | 2      | 3                      | 4     | 5                     |
| I've been feeling loved                            | 1                      | 2      | 3                      | 4     | 5                     |
| I've been interested in new things                 | 1                      | 2      | 3                      | 4     | 5                     |
| I've been feeling cheerful                         | 1                      | 2      | 3                      | 4     | 5                     |
