# Supplementary material for: The Warwick-Edinburgh Mental Well-being Scale (WEMWBS): development and UK validation
Source: Springer Nature journal article supplement (doi:10.1186/1477-7525-5-63), 2007-11-27

### WEMWBS questions: population sample

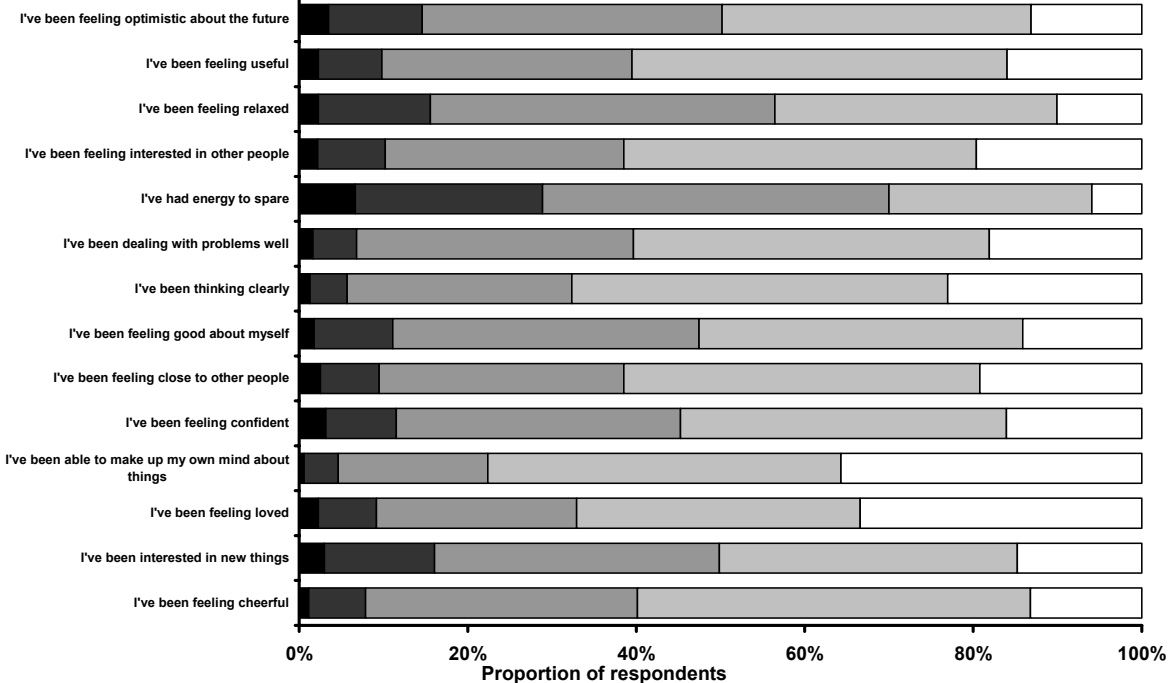

### WEMWBS questions: student sample

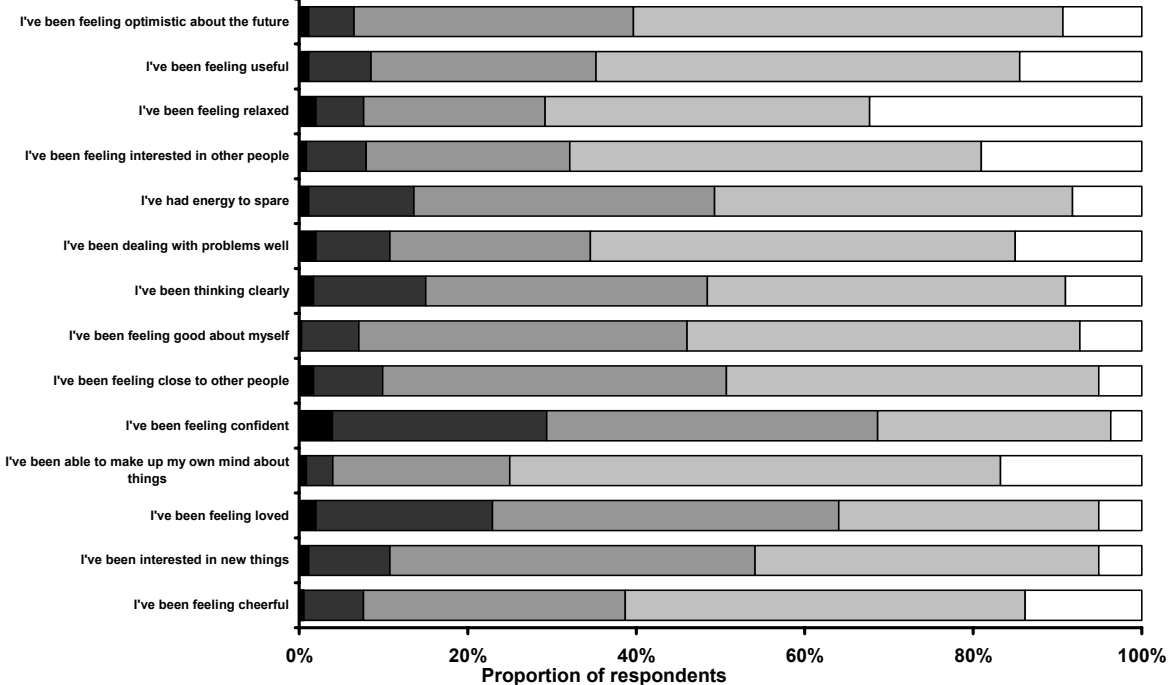

Supplement: 12955_2007_394_MOESM2_ESM.pdf [file 12955_2007_394_MOESM2_ESM.pdf]
